# Supplementary material
Source: publisher figshare collection journal article supplement (https://geolsoc.figshare.com/ndownloader/files/21080022)
Supplement: Supplementary file 1 [file 21080022]

## Sheet: EDC
Supplemental Table 3: Compiled Nd isotopic data for granitoids and volcanics of the Eastern Dharwar Craton
Block	Sample no.	Formation	Lithology	T (Ma)*	Sm	Nd	147Sm/144Nd	143Nd/144Nd	TDM1(Ga)	TDM2(Ga)	Ɛ Nd(T)	fSm/Nd	Reference	Granitoid Type		*Age Reference
EDC	KGR54B	Foliated gneiss	Gneiss	2510 (ref age 12)			0.0992	0.51101	2.83		-0.3	-0.495679	Dey et al., 2014	Sanukitoids		1	Anand & Balakrishnan 2011
EDC	KGR301	Foliated gneiss	Gneiss	2510 (ref age 12)	4	27.5	0.0875	0.51076	2.87		-1.5	-0.55516	Dey et al., 2014	Hybrid		2	Dey et al., 2012
EDC	KGR304	Foliated gneiss	Gneiss	2510 (ref age 12)	3.6	22.3	0.0972	0.511	2.8		0.1	-0.505846	Dey et al., 2014	Bt 2 mica		3	Dey et al.,2013
EDC	KGR2	Leucogranite	Leucogranite	2520 (ref age 12)	7.05	42.71	0.0994	0.51106	2.76		0.9	-0.494662	Dey et al., 2014	Hybrid		4	Drury et al 1983
EDC	KGR161	Leucogranite	Leucogranite	2520 (ref age 12)	10.1	72.5	0.0839	0.51063	2.94		-2.6	-0.573462	Dey et al., 2014	Hybrid		5	Jayananda et al 1995
EDC	KGR163	Leucogranite	Leucogranite	2520 (ref age 12)	8.8	62.7	0.0845	0.51058	3.01		-3.7	-0.570412	Dey et al., 2014	Hybrid		6	Jayananda et al., 2000
EDC	KGR18	Western monzogranite	Monzogranite	2540 (ref age 12)	1.8	11.04	0.0981	0.51104	2.76		1.2	-0.501271	Dey et al., 2014	Hybrid		7	Krogstad et al., 1995
EDC	KGR28	Western monzogranite	Monzogranite	2540 (ref age 12)	2.34	14.03	0.1004	0.51123	2.57		4.1	-0.489578	Dey et al., 2014	Hybrid		8	Moyen at al 2003 a
EDC	KGR9	Eastern Granodiorite	Granodiorite	2560 (ref age 12)	6	33.5	0.1078	0.51114	2.88		0	-0.451957	Dey et al., 2014	Hybrid		9	Peucat et al., 1989
EDC	KGR13	Eastern Granodiorite	Granodiorite	2560 (ref age 12)	3.75	20.7	0.109	0.51134	2.62		3.6	-0.445857	Dey et al., 2014	hybrid		10	Anand and Balakrishnan, 2010
EDC	PTDG1	Closepet Granite (Pattadkal)	Anatectic granite	2500 (ref age 5)	12.8	79.29	0.0983	0.51093	2.91	3	-1.69	-0.500254	Dey et al., 2012	Hybrid		11	Balakrishnan et al., 1990
EDC	PTDG3	Closepet Granite (Pattadkal)	Anatectic granite	2500 (ref age 5)	11.51	71.49	0.098	0.51095	2.88	2.96	-1.23	-0.501779	Dey et al., 2012	Hybrid		12	Dey et al., 2014
EDC	PTDG5	Closepet Granite (Pattadkal)	Anatectic granite	2500 (ref age 5)	12.93	83.38	0.0944	0.5109	2.85	2.94	-1.03	-0.520081	Dey et al., 2012	Hybrid		13	Balakrishnan et al 1999
EDC	PTDG6	Closepet Granite (Pattadkal)	Anatectic granite	2500 (ref age 5)	13.11	80.71	0.0989	0.51092	2.94	3.03	-2.09	-0.497204	Dey et al., 2012	Hybrid		14	Nutman et al 1996
EDC	PTDG7	Closepet Granite (Pattadkal)	Anatectic granite	2500 (ref age 5)	11.69	72.92	0.0976	0.51094	2.88	2.96	-1.31	-0.503813	Dey et al., 2012	Hybrid		15	Sarma et al 2008
EDC	PTDG8	Closepet Granite (Pattadkal)	Anatectic granite	2500 (ref age 5)	12.56	74.13	0.1029	0.511	2.93	3	-1.8	-0.476868	Dey et al., 2012	Hybrid		16	Krogstad et al., 1991
EDC	PTDG9	Closepet Granite (Pattadkal)	Anatectic granite	2500 (ref age 5)	12.66	77.63	0.0992	0.51101	2.83	2.89	-0.44	-0.495679	Dey et al., 2012	Hybrid		17	Krogstad et al., 1995
EDC	PTDG10	Closepet Granite (Pattadkal)	Anatectic granite	2500 (ref age 5)	10.78	67.31	0.0974	0.51092	2.9	2.99	-1.6	-0.50483	Dey et al., 2012	Hybrid		18	Chardon et al., 2002
EDC	GLDG2	Closepet Granite (Guledagudda)	Anatectic granite	2500 (ref age 5)	7.62	41.58	0.1112	0.51117	2.93	2.96	-1.29	-0.434672	Dey et al., 2012	Bt 2 mica		19	Peucat et al., 1993
EDC	GLDG3	Closepet Granite (Guledagudda)	Anatectic granite	2500 (ref age 5)	7.34	40.71	0.1097	0.51107	3.03	3.03	-2.66	-0.442298	Dey et al., 2012	Bt 2 mica
EDC	GLDG5	Closepet Granite (Guledagudda)	Anatectic granite	2500 (ref age 5)	7.68	40.06	0.1167	0.51123	3.01	3.01	-1.94	-0.406711	Dey et al., 2012	Bt 2 mica
EDC	GLDG8	Closepet Granite (Guledagudda)	Anatectic granite	2500 (ref age 5)	6.92	36.5	0.1154	0.51125	2.93	2.94	-1.05	-0.41332	Dey et al., 2012	Bt 2 mica
EDC	GLDG7	Closepet Granite (Guledagudda)	Anatectic granite	2500 (ref age 5)	7.26	28.1	0.1151	0.51124	2.94	2.96	-1.13	-0.414845	Dey et al., 2012	Bt 2 mica
EDC	GLDG9	Closepet Granite (Guledagudda)	Anatectic granite	2500 (ref age 5)	6.91	35.97	0.1169	0.51122	3.02	3.03	-2.15	-0.405694	Dey et al., 2012	Bt 2 mica
EDC	GLDG10	Closepet Granite (Guledagudda)	Anatectic granite	2500 (ref age 5)	7.05	36.1	0.1189	0.51129	2.97	2.96	-1.33	-0.395526	Dey et al., 2012	Bt 2 mica
EDC	KLKG6	Closepet Granite (Guledagudda)	Granodiorite	2500 (ref age 5)	3.34	23.9	0.0852	0.51067	2.93	3.07	-2.66	-0.566853	Dey et al., 2012	Hybrid
EDC	KLKG2	Closepet Granite (Guledagudda)	Granodiorite	2500 (ref age 5)	9.57	66.8	0.0872	0.51081	2.8	2.9	-0.52	-0.556685	Dey et al., 2012	Hybrid
EDC	KLKG5	Closepet Granite (Guledagudda)	Granodiorite	2500 (ref age 5)	10.01	65.95	0.0925	0.51088	2.84	2.93	-0.88	-0.529741	Dey et al., 2012	Hybrid
EDC	KLKG7	Closepet Granite (Guledagudda)	Granodiorite	2500 (ref age 5)	6.77	43.8	0.094	0.51092	2.83	2.91	-0.64	-0.522115	Dey et al., 2012	Hybrid
EDC	KLKG10	Closepet Granite (Guledagudda)	Granodiorite	2500 (ref age 5)	7.29	45.25	0.0979	0.51094	2.89	2.97	-1.39	-0.502288	Dey et al., 2012	Hybrid
EDC	ALMG1	Closepet Granite (Nidgundi)	Anatectic granite	2500 (ref age 5)	3.964	31.19	0.0774	0.5107	2.73	2.8	-0.44	-0.606507	Dey et al., 2012	Bt 2 mica
EDC	ALMG2	Closepet Granite (Nidgundi)	Anatectic granite	2500 (ref age 5)	4.104	32.39	0.0771	0.51063	2.8	2.93	-0.9	-0.608033	Dey et al., 2012	Bt 2 mica
EDC	ALMG3	Closepet Granite (Nidgundi)	Anatectic granite	2500 (ref age 5)	5.215	40.96	0.0775	0.51059	2.85	2.99	-1.7	-0.605999	Dey et al., 2012	Bt 2 mica
EDC	ALMG4	Closepet Granite (Nidgundi)	Anatectic granite	2500 (ref age 5)	6.861	54.64	0.0764	0.51067	2.74	2.84	0.24	-0.611591	Dey et al., 2012	Bt 2 mica
EDC	ALMG7	Closepet Granite (Nidgundi)	Anatectic granite	2500 (ref age 5)	4.859	40.68	0.0727	0.51067	2.67	2.75	1.41	-0.630402	Dey et al., 2012	Bt 2 mica
EDC	ALMG9	Closepet Granite (Nidgundi)	Anatectic granite	2500 (ref age 5)	2.831	21.67	0.0795	0.51083	2.63	2.68	2.39	-0.595831	Dey et al.,2013	Bt 2 mica
EDC	ALMP1	Closepet Granite (Nidgundi)	Anatectic granite	2500 (ref age 5)	4.479	34.9	0.0781	0.51068	2.76	2.86	-0.07	-0.602949	Dey et al., 2012	Bt 2 mica
EDC	ALMP2	Closepet Granite (Nidgundi)	Anatectic granite	2500 (ref age 5)	4.232	32.55	0.0792	0.51068	2.78	2.9	-0.52	-0.597356	Dey et al., 2012	Bt 2 mica
EDC	ALMP3	Closepet Granite (Nidgundi)	Anatectic granite	2500 (ref age 5)	2.036	10.77	0.115	0.51144	2.63	2.64	2.89	-0.415353	Dey et al.,2013	Bt 2 mica
EDC	ALMP6	Closepet Granite (Nidgundi)	Anatectic granite	2500 (ref age 5)	4.14	24.91	0.1012	0.51117	2.67	2.69	2.05	-0.485511	Dey et al., 2012	Bt 2 mica
EDC	ALMP7	Closepet Granite (Nidgundi)	Anatectic granite	2500 (ref age 5)	5.593	37.74	0.0902	0.51081	2.87	2.98	-1.54	-0.541434	Dey et al., 2012	Bt 2 mica
EDC	ALMP8	Closepet Granite (Nidgundi)	Anatectic granite	2500 (ref age 5)	6.326	46.23	0.0833	0.51075	2.81	2.92	-0.5	-0.576512	Dey et al., 2012	Bt 2 mica
EDC	ALMP9	Closepet Granite (Nidgundi)	Anatectic granite	2500 (ref age 5)	6.284	45.52	0.084	0.51074	2.82	2.94	-0.97	-0.572954	Dey et al., 2012	Bt 2 mica
EDC	BH99	Closepet Granite (Pavagada)	Granitoid	2500 (ref age 5)			0.0917	0.51086	2.85	2.95	-1	-0.533808	Moyen at al 2003 a	Bt 2 mica
EDC	BH111	Closepet Granite (Kalyandurga)	Granitoid	2500 (ref age 5)	5.9	45.2	0.0793	0.51024	2.7	2.78	-9.01	-0.596848	Moyen at al 2003 a	Bt 2 mica
EDC	BH296a	Closepet Granite (Kalyandurga)	Granitoid	2500 (ref age 5)	7.1	40.9	0.1053	0.5109	3.14	3.23	-4.53	-0.464667	Moyen at al 2003 a	Bt 2 mica
EDC	BH296b	Closepet Granite (Kalyandurga)	Granitoid	2500 (ref age 5)	13.8	76.4	0.1093	0.51104	3.07	3.25	-3.14	-0.444331	Moyen at al 2003 a	Bt 2 mica
EDC	BH296c	Closepet Granite (Kalyandurga)	Granitoid	2500 (ref age 5)	12	91.9	0.0792	0.51048	3.01	3.21	-4.34	-0.597356	Moyen at al 2003 a	Bt 2 mica
EDC	BH335	Closepet Granite (Kalyandurga)	Anatectic granite	2500 (ref age 5)	3.3	20.8	0.0947	0.51091	2.87	2.93	-1	-0.518556	Moyen at al 2003 a	Bt 2 mica
EDC	BH342	Closepet Granite (Kalyandurga)	Anatectic granite	2500 (ref age 5)	4.4	35.1	0.0748	0.51063	2.75	2.86	-1	-0.619725	Moyen at al 2003 a	Bt 2 mica
EDC	BH119	Closepet Granite (Kalyandurga)	Anatectic granite	2500 (ref age 5)	9.4	57.2	0.0996	0.51088	3.01	3.11	-3.06	-0.493645	Moyen at al 2003 a	Bt 2 mica
EDC	BH129a	Closepet Granite (Hospet)	Anatectic granite	2500 (ref age 5)	3.5	20.3	0.1041	0.51084	3.2	3.3	-5.41	-0.470768	Moyen at al 2003 a	Bt 2 mica
EDC	BH137a	Closepet Granite (Sandur)	Anatectic granite	2500 (ref age 5)	7.3	49.2	0.0893	0.51078	2.89	3	-1.67	-0.546009	Moyen at al 2003 a	Bt 2 mica
EDC	R-1	Ramagiri Granite	Qtz monzodiorite	2510 (ref age)19	16.9	92.2	0.1108	0.51095	3.24	3.29	-5.24	-0.436706	Anand & Balakrishnan 2011	Hybrid
EDC	CG9	Closepet Granite	Qtz. monzonite	2518 (ref age 5)	25.61	152.84	0.1013	0.5111	2.76	2.8	0.94	-0.485003	Jayananda et al 1995	Sanukitoids
EDC	CG 37	Closepet Granite	Qtz. monzonite	2518 (ref age 5)	20.75	133.24	0.0941	0.51081	2.96	3.07	-2.36	-0.521607	Jayananda et al 1995	Sanukitoids
EDC	CG 27	Closepet Granite	Qtz. monzonite	2518 (ref age 5)	15.92	100.16	0.0961	0.51087	2.93	3.03	-1.85	-0.511439	Jayananda et al 1995	Sanukitoids
EDC	CG 27 (2)	Closepet Granite	Qtz. monzonite	2518 (ref age 5)	15.83	98.22	0.0974	0.51089	2.94	3.03	-1.92	-0.50483	Jayananda et al 1995	Sanukitoids
EDC	CG 23	Closepet Granite	Monzogranite	2518 (ref age 5)	14.22	88.34	0.0973	0.51085	2.99	3.09	-2.65	-0.505338	Jayananda et al 1995	Hybrid
EDC	CG 28	Closepet Granite	Monzogranite	2518 (ref age 5)	13.48	96.76	0.0842	0.51057	3.01	3.19	-3.87	-0.571937	Jayananda et al 1995	Hybrid
EDC	CG 5	Closepet Granite	Monzogranite	2518 (ref age 5)	15.26	94	0.0981	0.51089	2.96	3.05	-2.18	-0.501271	Jayananda et al 1995	Hybrid
EDC	CG 3	Closepet Granite	Anatectic granite	2518 (ref age 5)	4.59	31.73	0.0875	0.51065	3	3.16	-3.49	-0.55516	Jayananda et al 1995	Bt 2 mica
EDC	CG 12	Closepet Granite	Anatectic granite	2518 (ref age 5)	24.55	135.6	0.1095	0.51077	3.45	3.53	-8.17	-0.443315	Jayananda et al 1995	Bt 2 mica
EDC	CG 42	Closepet Granite	Anatectic granite	2518 (ref age 5)	10.85	70.87	0.0926	0.51079	2.96	3.07	-2.41	-0.529232	Jayananda et al 1995	Bt 2 mica
EDC	CG 29	Closepet Granite	Anatectic granite	2518 (ref age 5)	5.56	42.85	0.0784	0.51045	3.02	3.23	-4.38	-0.601423	Jayananda et al 1995	Bt 2 mica
EDC	CG 31	Closepet Granite	Anatectic granite	2518 (ref age 5)	0.69	5.25	0.0798	0.51047	3.03	3.23	-4.46	-0.594306	Jayananda et al 1995	Bt 2 mica
EDC	CHT2	Closepet Granite	Anatectic granite	2518 (ref age 5)	8.08	49.98	0.0978	0.51066	3.25	3.4	-6.54	-0.502796	Jayananda et al 1995	Bt 2 mica
EDC	84-30	Agmatitic Gneiss	Agmatite	2530 (ref. age)16	0.84	8.76	0.0578	0.51032	2.76	2.9	-0.06	-0.706151	Krogstad et al., 1995	Hybrid
EDC	01 27	Khamba Gneiss	Granodiorite	25321 (ref age 16 )	2.32	14.6	0.0959	0.51112	2.61	2.62	3.32	-0.512456	Krogstad et al., 1995	Sanukitoids
EDC	4 28	Khamba Gneiss	Granodiorite	2532 (ref age 16 )	2.08	14.93	0.084	0.51077	2.78	2.87	0.26	-0.572954	Krogstad et al., 1995	Sanukitoids
EDC	02 26	Khamba Gneiss	Granodiorite	2532 (ref age 16 )	2.64	15.91	0.1105	0.51126	2.78	2.82	1.18	-0.438231	Krogstad et al., 1995	Sanukitoids
EDC	3 27	Khamba Gneiss	Granodiorite	2532 (ref age 16 )	2.48	14.85	0.1011	0.51105	2.83	2.88	0.14	-0.486019	Krogstad et al., 1995	Sanukitoids
EDC	84-29	Khamba Gneiss	Granodiorite	2532 (ref age 16 )	2.55	14.55	0.1058	0.51113	2.84	2.88	0.18	-0.462125	Krogstad et al., 1995	Sanukitoids
EDC	84-37	Khamba Gneiss	Granodiorite	2532 (ref age 16 )	2.49	14.83	0.1015	0.51112	2.74	2.77	1.47	-0.483986	Krogstad et al., 1995	Sanukitoids
EDC	23 1	Khamba Gneiss	Granodiorite	2532 (ref age 16 )	3.06	17.55	0.1053	0.51119	2.74	2.76	1.57	-0.464667	Krogstad et al., 1995	Sanukitoids
EDC	84-15	Khamba Gneiss	Granodiorite	2532 (ref age 16 )	2.63	16.37	0.0973	0.51103	2.76	2.81	0.96	-0.505338	Krogstad et al., 1995	Sanukitoids
EDC	86-53	Khamba Gneiss	Granodiorite	2532 (ref age 16 )	4.22	26.33	0.0969	0.51098	2.81	2.87	0.22	-0.507372	Krogstad et al., 1995	Sanukitoids
EDC	Ind 61a	Bangalore Granite	Granite	2537 (ref age 12)	3.49	23	0.092	0.51072	3.02	3.05	-3.18	-0.532283	Jayananda et al., 2000	Hybrid
EDC	Ind 61b	Bangalore Granite	Granite	2537 (ref age 12)	6.34	47.6	0.081	0.51054	2.97	3.61	-3.12	-0.588205	Jayananda et al., 2000	Hybrid
EDC	Ind 61c	Bangalore Granite	Granite	2537 (ref age 12)	4.54	21.2	0.13	0.51115	3.61	3.47	-7.28	-0.339095	Jayananda et al., 2000	Bt 2 mica
EDC	Ind 61d	Bangalore Granite	Granite	2537 (ref age 12)	3.99	16.2	0.149	0.51186	3.02	2.86	0.39	-0.242501	Jayananda et al., 2000	TTG
EDC	Ind 61e	Bangalore Granite	Granite	2537 (ref age 12)	10.9	59.7	0.111	0.51087	3.35	3.41	-6.48	-0.435689	Drury et al., 1983	Bt 2 mica
EDC	BH41a	Bangalore Granite	Granite	2537 (ref age 12)	10.5	62.5	0.101	0.51092	2.99	3.07	-2.2	-0.486528	Drury et al., 1983	Sanukitoids
EDC	BH41b	Bangalore Granite	Granite	2537 (ref age 12)	2.92	15.2	0.116	0.51117	3.07	3.08	-2.32	-0.410269	Drury et al., 1983	Sanukitoids
EDC	BH23	Hoskote-Kolar Granite	Grd.-granite	2537 (ref age 12)	3.11	22.6	0.083	0.51075	2.79	2.87	0.88	-0.578038	Drury et al., 1983	Bt 2 mica
EDC	BH25a	Hoskote-Kolar Granite	Grd.-granite	2537 (ref age 12)	13.6	88.9	0.093	0.51089	2.88	2.92	0.31	-0.527199	Drury et al., 1983	Bt 2 mica
EDC	BH26a	Hoskote-Kolar Granite	Grd.-granite	2537 (ref age 12)	11.6	62.9	0.112	0.51121	2.89	2.91	0.29	-0.430605	Drury et al., 1983	Bt 2 mica
EDC	BH27b	Hoskote-Kolar Granite	Grd.-granite	2537 (ref age 12)	1.92	17.1	0.068	0.51053	2.73	2.83	1.53	-0.654296	Drury et al., 1983	Bt 2 mica
EDC	BH29	Hoskote-Kolar Granite	Grd.-granite	2537 (ref age 12)	8.83	58.5	0.091	0.51088	2.8	2.87	0.82	-0.537367	Drury et al., 1983	Bt 2 mica
EDC	BH31	Hoskote-Kolar Granite	Grd.-granite	2537 (ref age 12)	5.42	44.9	0.073	0.51061	2.73	2.82	1.41	-0.628876	Drury et al., 1983	Bt 2 mica
EDC	RBH-55	Hutti	Granitoid	2545 (ref age 15)	7.46	1.46	0.1181	0.51128	2.68		-0.8	-0.399593	Mohan et al., 2013	Sanukitoids
EDC	RBH-57	Hutti	Granitoid	2545 (ref age 15)	12.49	1.22	0.059	0.51028	2.63		-0.9	-0.700051	Mohan et al., 2013	TTG trans
EDC	RBH-60	Hutti	Granitoid	2545 (ref age 15)	9.89	1.64	0.1003	0.51079	2.9		-4.6	-0.490086	Mohan et al., 2013	TTG trans
EDC	IND182	TTG – W margin KSB	TTG	2545 (ref age 18)	8.7	64.4	0.082	0.51043	3.13	3.32	-5.99	-0.583122	Jayananda et al., 2000	Hybrid
EDC	IND183	TTG – W margin KSB	TTG	2545 (ref age 18)	6.04	36.7	0.1	0.51074	3.21	3.33	-5.89	-0.491612	Jayananda et al., 2000	Hybrid
EDC	IND184	TTG – W margin KSB	TTG	2545 (ref age 18)	2.6	16.3	0.097	0.51074	3.13	3.24	-4.85	-0.506863	Jayananda et al., 2000	Hybrid
EDC	20 3	Dod Gneiss	Tn-qtz monzodiorite	2545 (ref age 18)	7.94	47.42	0.1012	0.51107	2.8	2.83	1.73	-0.485511	Krogstad et al., 1995	Sanukitoids
EDC	21 6	Dod Gneiss	Tn-qtz monzodiorite	2545 (ref age 18)	5.36	32.9	0.0984	0.51089	2.98	3.05	-0.92	-0.499746	Krogstad et al., 1995	Sanukitoids
EDC	84-9	Dod Gneiss	Tn-qtz monzodiorite	2545 (ref age 18)	6.19	36.34	0.1029	0.51094	3.02	3.09	-1.41	-0.476868	Krogstad et al., 1995	Sanukitoids
EDC	86-69	Dod Gneiss	Tn-qtz monzodiorite	2545 (ref age 18)	10.33	60	0.1041	0.51106	2.89	2.92	0.61	-0.470768	Krogstad et al., 1995	Sanukitoids
EDC	01 30	Dosa Gneiss	Grd.-granite	2545 (ref age 18)	2.97	18.65	0.0962	0.51074	3.11	3.22	-3.32	-0.51093	Krogstad et al., 1995	Hybrid
EDC	03 29	Dosa Gneiss	Grd.-granite	2545 (ref age 18)	3.21	19.19	0.1011	0.51083	3.12	3.21	-3.26	-0.486019	Krogstad et al., 1995	Hybrid
EDC	84-25	Dosa Gneiss	Grd.-granite	2545 (ref age 18)	3.7	21.34	0.1048	0.51096	3.04	3.1	-1.87	-0.467209	Krogstad et al., 1995	Hybrid
EDC	84-38	Dosa Gneiss	Grd.-granite	2545 (ref age 18)	3.89	23.2	0.1013	0.51086	3.08	3.17	-2.67	-0.485003	Krogstad et al., 1995	Hybrid
EDC	84-44	Dosa Gneiss	Grd.-granite	2545 (ref age 18)	3.64	19.47	0.113	0.51106	3.14	3.17	-2.67	-0.425521	Krogstad et al., 1995	Hybrid
EDC	6697	Krishnagiri Gneiss	Tonalitic gneiss	2550 (ref age 19)	17.81	3.12	0.1059	0.51115	2.81	2.84	0.8	-0.461617	Peucat et al., 1989	TTG
EDC	6603	Krishnagiri Gneiss	Tonalitic gneiss	2550 (ref age 19)	17.21	1.92	0.0948	0.51101	2.73	2.78	1.61	-0.518048	Peucat et al., 1989	TTG
EDC	6604	Krishnagiri Gneiss	Tonalitic gneiss	2550 (ref age 19)	11.07	1.66	0.0905	0.51094	2.72	2.82	1.67	-0.539908	Peucat et al., 1989	TTG
EDC	6606	Krishnagiri Gneiss	Tonalitic gneiss	2550 (ref age 19)	4.59	0.52	0.0678	0.51056	2.7	2.77	1.69	-0.655313	Peucat et al., 1989	TTG
EDC	6610	Krishnagiri Gneiss	Granitic gneiss	2550 (ref age 19)	34.57	4.4	0.0769	0.51069	2.72	2.8	1.34	-0.609049	Peucat et al., 1989	Sanukitoids
EDC	6611	Krishnagiri Gneiss	Granitic gneiss	2550 (ref age 19)	2.22	0.19	0.0523	0.51033	2.64	2.71	2.45	-0.734113	Peucat et al., 1989	Sanukitoids
EDC	6612	Krishnagiri Gneiss	Granitic gneiss	2550 (ref age 19)	14.09	1.81	0.0778	0.51071	2.72	2.79	1.4	-0.604474	Peucat et al., 1989	Sanukitoids
EDC	6615	Krishnagiri Gneiss	Granitic gneiss	2550 (ref age 19)	11.73	1.33	0.0685	0.51058	2.69	2.76	1.85	-0.651754	Peucat et al., 1989	Sanukitoids
EDC	BH33	W margin of KSB Granite	Qtz. monzonite	2552 (ref age 6)	0.48	3.14	0.092	0.51092	2.78	2.84	0.88	-0.532283	Drury et al 1983	Sanukitoids
EDC	87/S7	W margin of KSB Granite	Qtz. monzonite	2552 (ref age 6)	7.18	42.2	0.103	0.51105	2.88	2.93	-0.26	-0.47636	Drury et al 1983	Sanukitoids
EDC	87/S20	W margin of KSB Granite	Qtz. monzonite	2552 (ref age 6)	6.19	34.9	0.107	0.51118	2.8	2.83	0.96	-0.456024	Jayananda et al 2000	Sanukitoids
EDC	03 1	Patna Granite	Grd.-granite	2552 (ref age 6)	6.86	43.62	0.095	0.51095	2.87	2.94	0.49	-0.517031	Krogstad et al., 1995	Hybrid
EDC	84-11	Patna Granite	Grd.-granite	2552 (ref age 6)	6.03	36.6	0.0993	0.51097	2.89	2.95	-0.53	-0.49517	Krogstad et al., 1995	Hybrid
EDC	86-58	Patna Granite	Grd.-granite	2552 (ref age 6)	10.79	51.96	0.1256	0.51137	3.07	3.02	-1.47	-0.361464	Krogstad et al., 1995	Hybrid
EDC	RB-14	Sandur	Granitoid	2570 (ref age 14)	24.01	3.71	0.0934	0.51078	2.75		-2.1	-0.525165	Mohan et al., 2013	Hybrid
EDC	23 6	Banded Gneiss	Granite	2600 (ref age 16)	5.66	21.22	0.1614	0.5118	3.91	3.31	-9.01	-0.179461	Krogstad et al., 1995	Hybrid
EDC	RBK-22	Kushtagi	Granitoid	2650 (ref age 13)	7.32	1.44	0.1191	0.5109	3.25		-7.5	-0.394509	Mohan et al., 2013	TTG
EDC	RBK-28	Kushtagi	Granitoid	2650 (ref age 13)	23.55	2.82	0.0724	0.51048	2.67		0.3	-0.631927	Mohan et al., 2013	Hybrid
EDC	RBK-40	Kushtagi	Granitoid	2650 (ref age 13)	20.51	3.76	0.111	0.51104	2.82		-1.9	-0.435689	Mohan et al., 2013	Hybrid
EDC	MLP157	TTG Gneiss	TTG	2650 (ref age 3)	1.7	14.57	0.074	0.51055	2.58	2.55	1.06	-0.623793	Dey et al.,2013	Hybrid
EDC	NSG158	TTG Gneiss	TTG	2650 (ref age 3)	5.51	34.68	0.1009	0.51082	2.88	2.92	-2.91	-0.487036	Dey et al.,2013	Hybrid
EDC	KDG160	TTG Gneiss	TTG	2650 (ref age 3)	1.86	18.41	0.0643	0.51039	2.57	2.53	1.39	-0.673106	Dey et al.,2013	Hybrid
EDC	MLP154	TTG Gneiss	TTG	2650 (ref age 3)	4.63	29.69	0.0989	0.51089	2.72	2.73	-0.82	-0.497204	Dey et al.,2013	Hybrid
EDC	JLH152	TTG Gneiss	TTG	2650 (ref age 3)	6.62	37.56	0.1118	0.51117	2.62	2.62	0.37	-0.431622	Dey et al.,2013	Hybrid
EDC	KDG161	TTG Gneiss	TTG	2650 (ref age 3)	10.74	76.33	0.0893	0.51073	2.7	2.71	-0.67	-0.546009	Dey et al.,2013	Hybrid
EDC	PG2	Bangalore TTG	TTG	3127 (ref age 6)	8.51	43.6	0.118	0.51092	3.52	3.52	-1.77	-0.400102	Jayananda et al 2000	TTG
EDC	PG20	Bangalore TTG	TTG	3127 (ref age 6)	4.92	25.5	0.117	0.51107	3.26	3.26	1.51	-0.405186	Jayananda et al 2000	TTG
EDC	SB1-23	Kolar belt	Basalt	2700	4.1	13.72	0.1807	0.5126	2.45		4.8	-0.08	Balakrishnan et al., 1990
EDC	SB3-23	Kolar belt	Basalt	2700	4.05	14.3	0.1714	0.51247	2.44		5.6	-0.13	Balakrishnan et al., 1990
EDC	SB27-2	Kolar belt	Basalt	2700	1.45	4.67	0.1875	0.5127	2.62		4.5	-0.05	Balakrishnan et al., 1990
EDC	SB3-26	Kolar belt	Basalt	2700	2.2	8.66	0.1532	0.51206	2.72		4	-0.22	Balakrishnan et al., 1990
EDC	2018-10-17	Kolar belt	Basalt	2700	3.03	10.46	0.1752	0.51244	2.78		3.8	-0.11	Balakrishnan et al., 1990
EDC	SB27-6	Kolar belt	Basalt	2700	1.91	4.68	0.2467	0.51366			2.6	0.25	Balakrishnan et al., 1990
EDC	SB29-1	Kolar belt	Basalt	2700	1.62	4.43	0.2217	0.51332			4.8	0.13	Balakrishnan et al., 1990
EDC	303	Kolar belt	Basalt	2700	1.47	3.78	0.2352	0.51348			3	0.2	Balakrishnan et al., 1990
EDC	K-3	Kolar belt	Basalt	2700	2.29	8.63	0.1587	0.51214	2.78		3.6	-0.19	Balakrishnan et al., 1990
EDC	K-23	Kolar belt	Basalt	2700	2.15	8.07	0.1611	0.5121	3.03		1.9	-0.18	Balakrishnan et al., 1990
EDC	SB1-28	Kolar belt	Basalt	2700	2.37	9.4	0.1521	0.512	2.82		3.2	-0.23	Balakrishnan et al., 1990
EDC	SB2-28	Kolar belt	Basalt	2700	2.16	8.18	0.1596	0.51216	2.76		3.7	-0.19	Balakrishnan et al., 1990
EDC	SB1-4	Kolar belt	Basalt	2700	2.27	8.65	0.1587	0.51216	2.74		3.8	-0.19	Balakrishnan et al., 1990
EDC	B1-83	Kolar belt	Basalt	2700	2.52	9.57	0.1591	0.51206	3.03		1.8	-0.19	Balakrishnan et al., 1990
EDC	SB4-4	Kolar belt	Basalt	2700	1.37	4.82	0.1715	0.51242	2.63		4.5	-0.13	Balakrishnan et al., 1990
EDC	HMB1	Hutti belt	Basalt	2662	3.09	9.7	0.1932	0.51271			2.7	-0.02	Anand and Balakrishnan, 2010
EDC	HMB2	Hutti belt	Basalt	2662	3.04	9.52	0.1932	0.51271			2.6	-0.02	Anand and Balakrishnan, 2010
EDC	HMB3	Hutti belt	Basalt	2662	2.87	9.01	0.1924	0.51263			1.4	-0.02	Anand and Balakrishnan, 2010
EDC	HMB4	Hutti belt	Basalt	2662	3.42	10.56	0.1958	0.51269			1.4	-0.01	Anand and Balakrishnan, 2010
EDC	HMB5	Hutti belt	Basalt	2662	1.69	4.88	0.2097	0.51294			2	-0.42	Anand and Balakrishnan, 2010
EDC	HMB8	Hutti belt	Basalt	2662	3.22	10.29	0.189	0.51259	3.4		1.8	-0.04	Anand and Balakrishnan, 2010
EDC	HMB10	Hutti belt	Basalt	2662	2.06	6.4	0.1947	0.51276	3			-0.01	Anand and Balakrishnan, 2010
EDC	HMB11	Hutti belt	Basalt	2662	2.24	8.31	0.1626	0.51219	2.85		2.9	-0.17	Anand and Balakrishnan, 2010
EDC	HAV1	Hutti belt	Acid	2662	1.2	7.19	0.1005	0.51087	3.04		3.11	-1.4	Anand and Balakrishnan, 2010
EDC	HAV2	Hutti belt	Acid	2662	1.5	8.3	0.1094	0.51104	3.06		3.1	-1.3	Anand and Balakrishnan, 2010
EDC	HMBSr	Hutti belt	Basalt	2662	5.41	29.5	0.1109	0.51122	2.85		1.7	-0.44	Anand and Balakrishnan, 2010
EDC	RM-186A	Sandur belt	basalt	2706	1	3.54	0.1698	0.51219	3.34		0.53	-0.14	Naqvi et al., 2002
EDC	RM-228	Sandur belt	basalt	2706	1.24	3.59	0.2088	0.51292	--		1.39	0.06	Naqvi et al., 2002
EDC	RM-205	Sandur belt	basalt	2706	0.6	1.82	0.1999	0.5127	--		0.1	0.02	Naqvi et al., 2002
EDC	RM-322	Sandur belt	Komatiite	2706	0.88	2.58	0.2046	0.5128	--		0.49	0.04	Naqvi et al., 2002
EDC	RM-202	Sandur belt	basalt	2706	1.41	4.23	0.2012	0.51273	--		0.26	0.02	Naqvi et al., 2002
EDC	RM-336	Sandur belt	Komatiite	2706	1.12	3.29	0.2058	0.51284	--		0.66	0.05	Naqvi et al., 2002
EDC	RM-198B	Sandur belt	basalt	2706	0.73	2.29	0.1918	0.51267	--		2.39	-0.02	Naqvi et al., 2002
EDC	RM-335	Sandur belt	Komatiite	2706	1.1	3.25	0.2042	0.51282	--		0.96	0.04	Naqvi et al., 2002

## Sheet: WDC
Supplemental Table 3: Whole rock Sm-Nd isotopic data for the granitoids of the Western Dharwar Craton
Block	Sample no.	Formation	Lithology	T (Ma)	Sm	Nd	147Sm/144Nd	143Nd/144Nd	TDM1(Ga)	TDM2(Ga)	Ɛ Nd(T)	fSm/Nd	Reference
WDC	BH-50c	Bellur–Nagamangala	Granite	3000	7.55	55	0.083	0.51035	3285		-0.7	-0.578038	Jayananda et al., 2019
WDC	BH-51c	Bellur–Nagamangala	Granite	3000	13.3	74.9	0.1076	0.51086	3237		-0.4	-0.452974	Jayananda et al., 2019
WDC	BH-51b	Bellur–Nagamangala	Granite	3000	11.5	63.8	0.1087	0.51087	3271		-0.7	-0.447382	Jayananda et al., 2019
WDC	CHT-2	Bellur–Nagamangala	Granite	3000	8.08	50	0.0978	0.51063	3292		-1	-0.502796	Jayananda et al., 2019
WDC	CHT-3	Bellur–Nagamangala	Granite	3000	6.55	36.3	0.1091	0.51086	3307		-0.9	-0.445348	Jayananda et al., 2019
WDC	CHT-4	Bellur–Nagamangala	Granite	3000	7.86	39.2	0.1211	0.51108	3379		-1.3	-0.384342	Jayananda et al., 2019
WDC	CHT-6	Bellur–Nagamangala	Granite	3000	9.89	42.3	0.1413	0.51151	3359		-0.7	-0.281647	Jayananda et al., 2019
WDC	Ind-413	Bellur–Nagamangala	Granite	3000	10.7	66.2	0.0976	0.51071			0.5	-0.503813	Jayananda et al., 2019
WDC	CHT-5	Bellur–Nagamangala	Granite	3000	2.8	15.8	0.1066	0.51077	3183		-1.7	-0.458058	Jayananda et al., 2019
WDC	BH-54b	West of Bellur	Granite	3000	7.47	47.4	0.0953	0.51061	3246		-0.5	-0.515506	Jayananda et al., 2019
WDC	ARK 1	Arsikere pluton	Granite	2610	10.1	60.9	0.1003	0.510772	3041	3173	-5.4	-0.490086	Jayananda et al., 2006
WDC	Ind 420	Arsikere pluton	Granite	2610	13.9	88.4	0.0951	0.510734	2957	3084	-4.5	-0.516523	Jayananda et al., 2006
WDC	BAN 5	Banavara pluton	Granite	2610	22.2	131	0.1026	0.510806	3058	3192	-5.5	-0.478393	Jayananda et al., 2006
WDC	Ind 400	Chitradurga pluton	Granite	2610	10.5	48.2	0.1318	0.511407	3037	3220	-3.2	-0.329944	Jayananda et al., 2006
WDC	Ind 401	Chitradurga pluton	Granite	2610	10.7	51.9	0.1246	0.511334	2917	3085	-2.3	-0.366548	Jayananda et al., 2006
WDC	Ind 403	Chitradurga pluton	Granite	2610	16.3	65.5	0.1506	0.511606	3460	3696	-5.3	-0.234367	Jayananda et al., 2006
WDC	Ind 406	Chitradurga pluton	Granite	2610	11.2	63.5	0.1063	0.51102	2863	3003	-2.5	-0.459583	Jayananda et al., 2006
WDC	Ind 408	Chitradurga pluton	Granite	2610	5.22	25.4	0.1245	0.511346	2893	3062	-2	-0.367056	Jayananda et al., 2006
WDC	Ind 411	Hosdurga pluton	Granite	2610	10.6	59.9	0.107	0.51097	2952	3093	-3.7	-0.456024	Jayananda et al., 2006
WDC	Ind 412	Hosdurga pluton	Granite	2610	5.53	28.2	0.1188	0.511082	3138	3296	-5.3	-0.396035	Jayananda et al., 2006
WDC	ARK 3	Arsikere pluton	Granite	2610	10.9	72.6	0.0911	0.510519	3124	3247	-7.4	-0.536858	Jayananda et al., 2006
WDC	BAN 1	Banavara pluton	Granite	2610	8.64	50.2	0.1041	0.510746	3181	3318	-7.2	-0.470768	Jayananda et al., 2006
WDC	BAN 2	Banavara pluton	Granite	2610	4.51	24.7	0.1105	0.510856	3217	3362	-7.1	-0.438231	Jayananda et al., 2006
WDC	BAN4	Banavara pluton	Granite	2610	6.2	34.1	0.1099	0.510846	3213	3357	-7.1	-0.441281	Jayananda et al., 2006
WDC	AG-63	Anmod Ghat Trondhjemite	Granite	2610	4.11	28.51	0.0871	0.5106	2931	3049	-4.6	-0.557194	Devaraju et al. 2007
WDC	AG-67	Anmod Ghat Trondhjemite	Granite	2610	4.2	25.42	0.0998	0.51087	2899	3031	-3.4	-0.492628	Devaraju et al. 2007
WDC	CR-07	Dudhsagar granite	Granite	2610	2.92	19.92	0.0886	0.51071	2834	2954	-2.9	-0.549568	Devaraju et al. 2007
WDC	CR-14	Dudhsagar granite	Granite	2610	2.93	12.52	0.1412	0.51165	2925	3131	-1.5	-0.282156	Devaraju et al. 2007
WDC	RN-41A	Ramnagar granitoids	Granite	2610	4.29	30.14	0.0859	0.51062	2880	2997	-3.8	-0.563294	Devaraju et al. 2007
WDC	Gor 3B	Gorur gneiss	TTG	3300	4.9	27.6	0.1065	0.510743	3256	3395	1	-0.458566	Jayananda et al., 2015
WDC	pap 93	Gorur gneiss	TTG	3300	4.8	27.5	0.1065	0.5108	3176	3316	2.1	-0.458566	Jayananda et al., 2015
WDC	Gor 3A2	Gorur gneiss	TTG	3300	12	43.8	0.1653	0.512	3282	3591	0.7	-0.159634	Jayananda et al., 2015
WDC	Gor 3A2	Gorur gneiss	TTG	3300	12.2	43.9	0.1678	0.512	3458	3784	-0.3	-0.146924	Jayananda et al., 2015
WDC	pap 93	Gorur gneiss	TTG	3300	12	43.8	0.1653	0.512	3282	3591	0.7	-0.159634	Jayananda et al., 2015
WDC	Gor 1B	Gorur gneiss	TTG	3300	10.5	43.3	0.1468	0.5116	3279	3502	0.7	-0.253686	Jayananda et al., 2015
WDC	Gor 1B	Gorur gneiss	TTG	3300	10.9	45	0.1457	0.5114	3666	3885	-2.7	-0.259278	Jayananda et al., 2015
WDC	Ind 55b	Gorur gneiss	TTG	3300	1.4	6	0.1456	0.5116	3222	3441	1.2	-0.259786	Jayananda et al., 2015
WDC	Ind 55c	Gorur gneiss	TTG	3300	2.2	11.1	0.1202	0.5111	3156	3316	2.2	-0.388917	Jayananda et al., 2015
WDC	Ind 55d	Gorur gneiss	TTG	3300	14	54	0.1562	0.5118	3288	3548	0.7	-0.205897	Jayananda et al., 2015
WDC	pap 93	Gorur gneiss	TTG	3300	13.9	53.2	0.1562	0.5118	3288	3548	0.7	-0.205897	Jayananda et al., 2015
WDC	Ind 55c	Gorur gneiss	TTG	3300	2.2	11.1	0.1202	0.5111	3156	3316	2.2	-0.388917	Jayananda et al., 2015
WDC	Ind 112a	Gorur gneiss	TTG	3300	36	139.2	0.1565	0.5119	3044	3305	2.5	-0.204372	Jayananda et al., 2015
WDC	Ind 101	Gorur gneiss	TTG	3300	12.2	46.5	0.1581	0.5118	3400	3668	-0.1	-0.196238	Jayananda et al., 2015
WDC	Ind 115	Gorur gneiss	TTG	3300	7.7	42.8	0.1092	0.5107	3400	3543	-1	-0.44484	Jayananda et al., 2015
WDC	Ind 114	Gorur gneiss	TTG	3300	4.5	38.5	0.0713	0.5099	3346	3451	-0.6	-0.637519	Jayananda et al., 2015
WDC	pap93	Gorur gneiss	TTG	3300	9.9	44	0.136	0.5114	3213	3406	1.4	-0.308592	Jayananda et al., 2015
WDC	Ind 110	Gorur gneiss	TTG	3300	24.9	96.3	0.1561	0.5118	3283	3542	0.7	-0.206406	Jayananda et al., 2015
WDC	Gor 3A1	Gorur gneiss	TTG	3300	2	7.7	0.1555	0.5118	3249	3506	1	-0.209456	Jayananda et al., 2015
WDC	Gor 2A (3)	Gorur gneiss	TTG	3300	1.2	3.8	0.1856	0.5124	3497	4028	0	-0.0564311	Jayananda et al., 2015
WDC	Gor 1A	Gorur gneiss	TTG	3300	1	3.5	0.1787	0.5123	3242	3669	0.9	-0.0915099	Jayananda et al., 2015
WDC	OEA 13	Eastern gneisses	TTG	3300	3	19.8	0.0929	0.5104	3318	3442	0	-0.527707	Jayananda et al., 2015
WDC	GUN1	Eastern gneisses	TTG	3300	7.5	29.4	0.1537	0.5117	3402	3651	-0.2	-0.218607	Jayananda et al., 2015
WDC	Ind 118	Eastern gneisses	TTG	3300	1.9	10.3	0.1108	0.5109	3162	3307	2.2	-0.436706	Jayananda et al., 2015
WDC	Ind 117	Eastern gneisses	TTG	3300	7.9	31.9	0.1507	0.5117	3242	3479	1	-0.233859	Jayananda et al., 2015
WDC	Ind 116	Eastern gneisses	TTG	3300	8.6	38.2	0.136	0.5114	3213	3406	1.4	-0.308592	Jayananda et al., 2015
WDC	Hl 5A	Trondhjemite plutons	TTG	3300	1.9	8.5	0.1348	0.5114	3165	3354	1.9	-0.314692	Jayananda et al., 2015
WDC	2018-04-30	Trondhjemite plutons	TTG	3300	2	8.9	0.1339	0.5113	3317	3504	0.3	-0.319268	Jayananda et al., 2015
WDC	2018-05-31	Trondhjemite plutons	TTG	3300	1.9	8.7	0.1314	0.5113	3217	3399	1.4	-0.331978	Jayananda et al., 2015
WDC	Ind 54b	Trondhjemite plutons	TTG	3300	1.6	6.6	0.1414	0.5115	3243	3450	1	-0.281139	Jayananda et al., 2015
WDC	2018-04-30	Trondhjemite plutons	TTG	3300	1.5	6.2	0.1455	0.5116	3217	3436	1.3	-0.260295	Jayananda et al., 2015
WDC	2018-05-31	Trondhjemite plutons	TTG	3300	1.5	6.2	0.1457	0.5116	3226	3446	1.2	-0.259278	Jayananda et al., 2015
WDC	HL 3A	Trondhjemite plutons	TTG	3300	1.5	6.2	0.15	0.5117	3207	3442	1.3	-0.237417	Jayananda et al., 2015
WDC	2018-04-30	Trondhjemite plutons	TTG	3300	1.5	6	0.1479	0.5117	3105	3333	2.2	-0.248094	Jayananda et al., 2015
WDC	Hl 1A	Trondhjemite plutons	TTG	3300	4.3	20	0.1297	0.5112	3331	3509	0.1	-0.34062	Jayananda et al., 2015
WDC	pap 93	Trondhjemite plutons	TTG	3300	4.29	19.9	0.1297	0.5113	3153	3331	2.1	-0.34062	Jayananda et al., 2015
WDC	Ind 56a	Chikmagalur TTG and granite	TTG	3300	9.9	44.1	0.136	0.5114	3213	3406	1.4	-0.308592	Jayananda et al., 2015
WDC	pap93	Chikmagalur TTG and granite	TTG	3300	9.9	44	0.136	0.5114	3213	3406	1.4	-0.308592	Jayananda et al., 2015
WDC	Ind 57a	Chikmagalur TTG and granite	TTG	3300	3.6	22.4	0.096	0.5105	3277	3404	0.7	-0.511947	Jayananda et al., 2015
WDC	Ind 57b	Chikmagalur TTG and granite	TTG	3300	3.1	17.2	0.1106	0.5108	3301	3446	0.4	-0.437722	Jayananda et al., 2015
WDC	Ind 477	Chikmagalur TTG and granite	TTG	3300	28	28.5	0.1024	0.5106	3329	3464	-0.1	-0.47941	Jayananda et al., 2015
WDC	Ind 478	Chikmagalur TTG and granite	TTG	3300	1.8	11	0.1009	0.5106	3286	3418	0.5	-0.487036	Jayananda et al., 2015
WDC	Ind 479	Chikmagalur TTG and granite	TTG	3300	10	50.2	0.1198	0.511	3302	3462	0.4	-0.390951	Jayananda et al., 2015
WDC	Gor 3b	Gorur gneiss	TTG	3300	4.86	27.59	0.1065	0.510783	3200	3339	1.8	-0.458566	Peucat et al., 1993
WDC	HL 1a	Gorur gneiss	TTG	3300	4.29	19.99	0.1297	0.511253	3237	3415	1.2	-0.34062	Peucat et al., 1993
WDC	HL 5a	Gorur gneiss	TTG	3300	1.9	8.5	0.1348	0.511393	3178	3368	1.7	-0.314692	Peucat et al., 1993
WDC	IND 56a	Gorur gneiss	TTG	3300	9.92	44.08	0.136	0.511441	3134	3327	2.2	-0.308592	Peucat et al., 1993
WDC	IND 55b	Gorur gneiss	TTG	3300	1.44	5.98	0.1456	0.511591	3241	3461	1.1	-0.259786	Peucat et al., 1993
	Ages are from corresponding references
